# Supplementary material for: A DUSP6 inhibitor suppresses inflammatory cardiac remodeling and improves heart function after myocardial infarction
Source: PubMed Central journal article supplement (PMC9789401; doi:10.1242/dmm.049662), 2022-12-07
Supplement: dmm-16-049662-s1.pdf [file dmm-16-049662-s1.pdf]

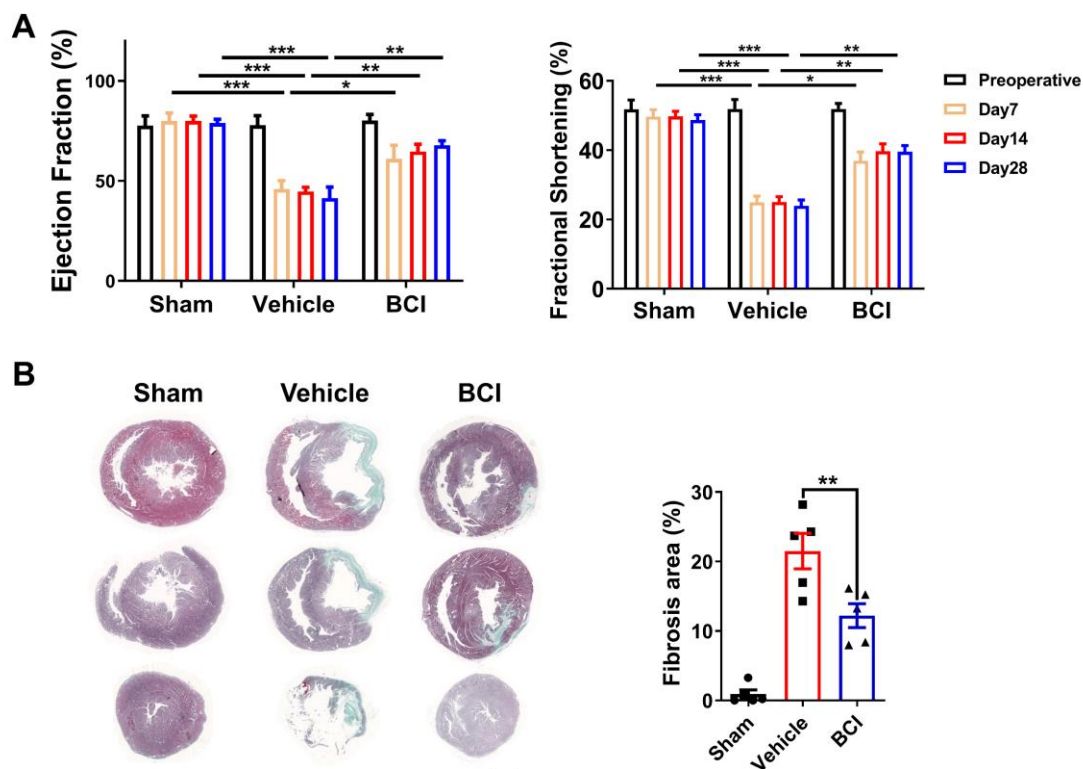

**Fig. S1. BCI treatment, immediately after MI, improves heart function and decreased cardiac fibrosis.** (A) ECHO data showing ejection fraction and fractional shortening of sham-operated and 4 weeks post-MI rats treated with DMSO or BCI, which DMSO/BCI treatment was carried out immediately after MI (n = 8–9 per group). (B) Masson's trichrome staining and quantification of the Masson's trichrome-stained fibrotic area in sham, vehicle, and BCI-treated hearts at 28 days post-MI (Scale bar, 3 mm; n = 5 per group). Mean  $\pm$  s.e.m.; ns, not significant; \*P < 0.05; \*\*P < 0.01, \*\*\*P < 0.001.

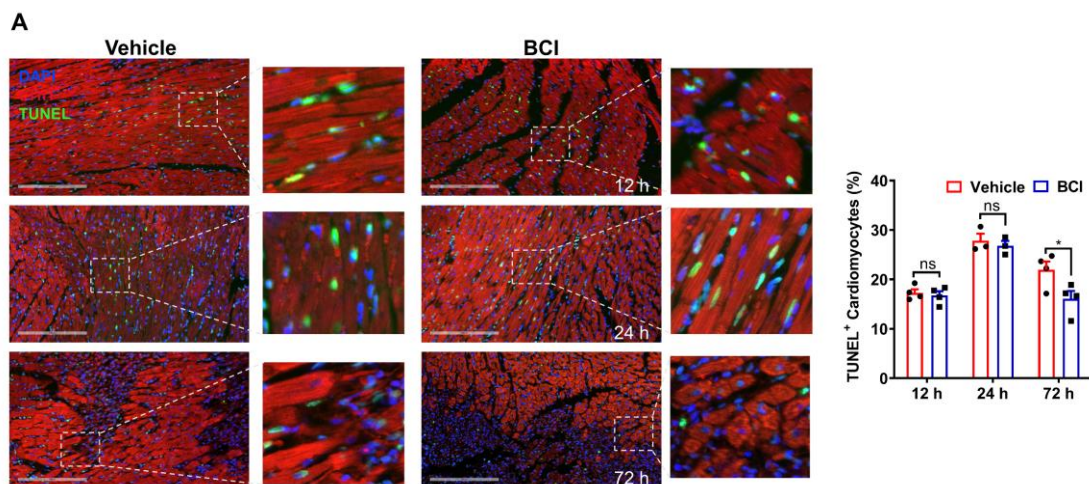

**Fig. S2. BCI inhibits cardiomyocyte apoptosis at 72 h post MI, but not at 12 h and 24 h post MI.** (A) Immunostaining and percentage of TUNEL-positive CMs in the infarcted zone of sham-operated, vehicle, and BCI-treated heart sections at 12 h, 24 h, and 72 h post-MI. Scale bars, 200  $\mu$ m. (n = 3–4 per group). Mean  $\pm$  s.e.m.; ns, not significant; \*P < 0.05.

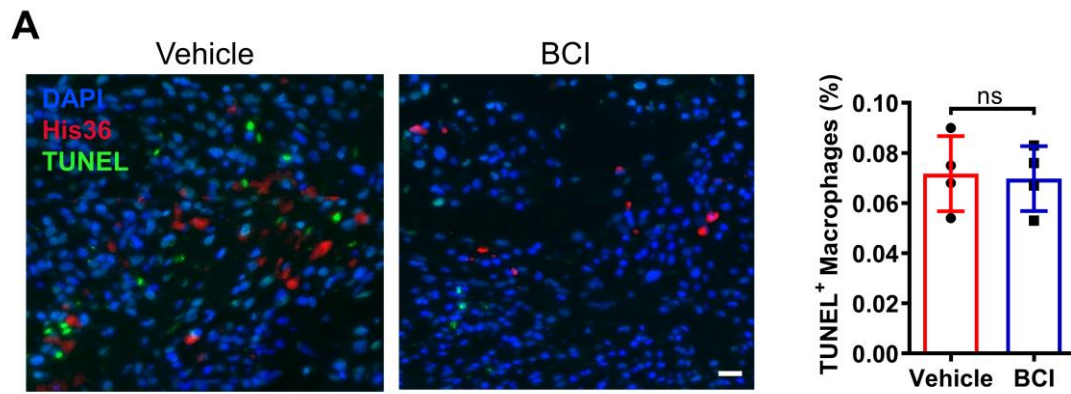

**Fig. S3. BCI treatment has no effect on macrophage death of infarcted rat hearts at 7 days post MI.** (A) Immunostaining and quantification of TUNEL-positive macrophages in the infarcted zone of vehicle and BCI-treated heart sections (Scale bar, 50  $\mu$ m; n = 4 per group). ns, not significant.

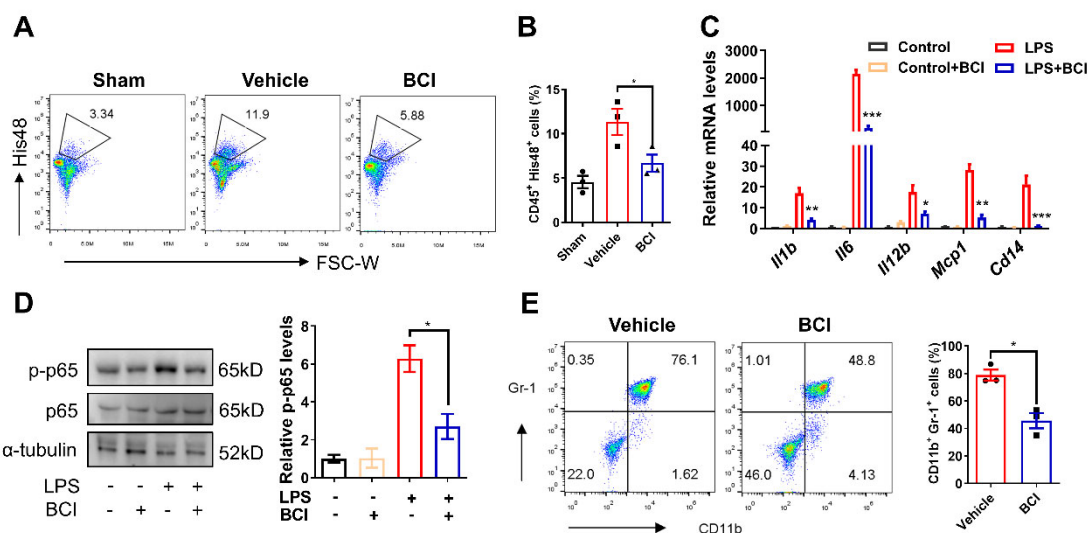

**Fig. S4. BCI treatment inhibits neutrophil recruitment in infarcted rat hearts and LPS-induced mouse abdominal cells.** (A, B) Percentages of His48<sup>+</sup> neutrophils in the LV of rats at 7 days post-MI by flow cytometry (A), and statistics of His48<sup>+</sup> neutrophils (B) (n = 3 per group and 2 hearts each group). (C) qRT-PCR showing expression levels of LPS-induced *Il1b*, *Il6*, *Il12b*, *Mcp1* and *Cd14* mRNAs in ABNs treated with DMSO or BCI (n = 3 per group). (D) Western blots and quantification of LPS-induced p-p65 and p65 in ABNs with DMSO or BCI (n = 3 per group). (E) Percentages of LPS-induced CD11b<sup>+</sup> Gr-1<sup>+</sup> neutrophils in mouse abdominal cells by flow cytometry, and statistics of CD11b<sup>+</sup> Gr-1<sup>+</sup> neutrophils (n = 3 per group and combined abdominal cells of 2 mice per sample). One-way ANOVA followed by Dunnett's multiple comparison test; mean ± s.e.m.; \*P < 0.05; \*\*P < 0.01, \*\*\*P < 0.001.

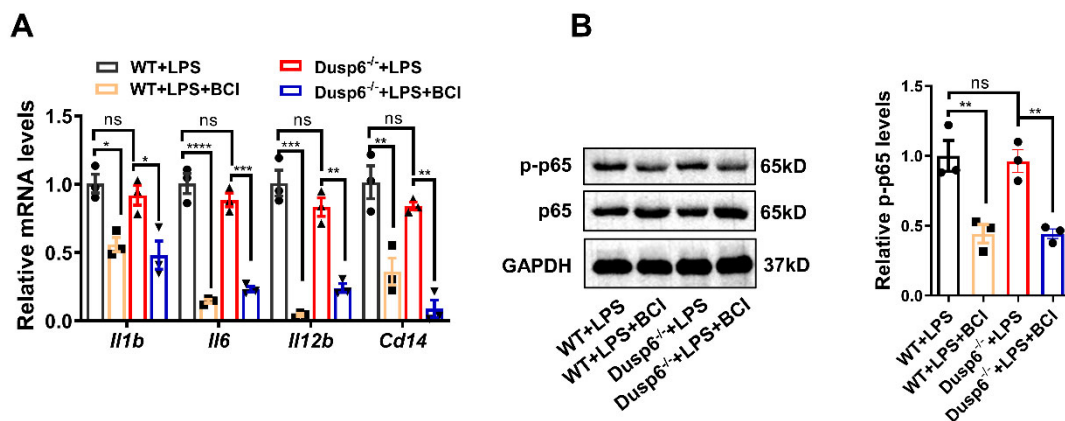

**Fig. S5. BCI inhibits macrophage inflammation independent of DUSP6.** (A) qRT-PCR showing expression levels of LPS-induced *Il1b*, *Il6*, *Il12b* and *Cd14* mRNAs in WT or *Dusp6*<sup>-/-</sup> BMDMs with DMSO or BCI (n = 3 per group). (B) Western blots and quantification of LPS-induced p-p65 and p65 in WT or *Dusp6*<sup>-/-</sup> BMDMs with DMSO or BCI (n = 3 per group). Mean ± s.e.m.; \*P <0.05; \*\*P <0.01, \*\*\*P <0.001, \*\*\*\*P <0.0001.

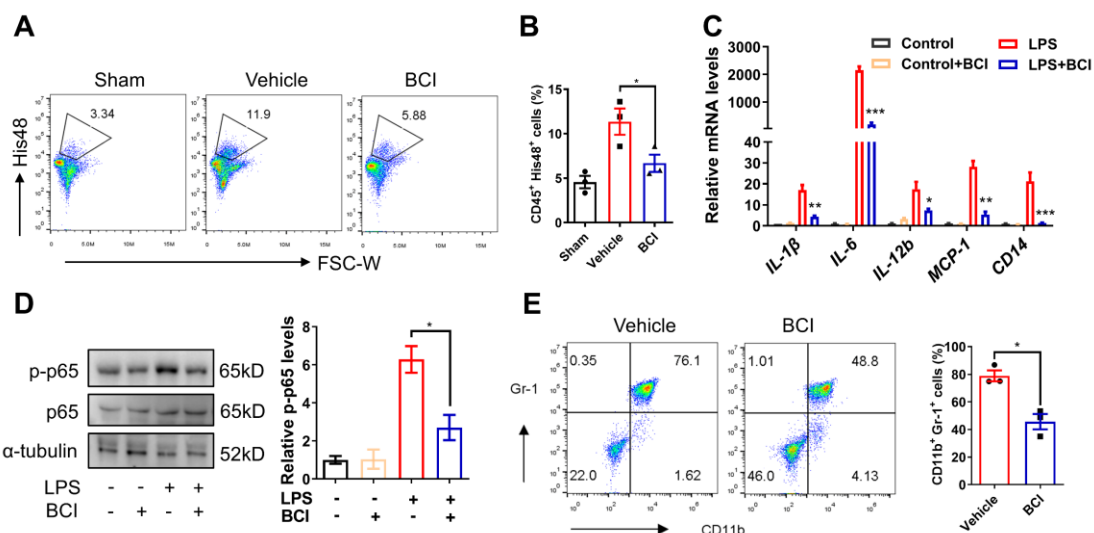

**Fig. S4. BCI treatment inhibits neutrophil recruitment in infarcted rat hearts and LPS-induced mouse abdominal cells.** (A, B) Percentages of His48<sup>+</sup> neutrophils in the LV of rats at 7 days post-MI by flow cytometry (A), and statistics of His48<sup>+</sup> neutrophils (B) (n = 3 per group and 2 hearts each group). (C) qRT-PCR showing expression levels of LPS-induced *IL-1 $\beta$* , *IL-6*, *IL-12b*, *Mcp1* and *CD14* mRNAs in ABNs treated with DMSO or BCI (n = 3 per group). (D) Western blots and quantification of LPS-induced p-p65 and p65 in ABNs with DMSO or BCI (n = 3 per group). (E) Percentages of LPS-induced CD11b<sup>+</sup> Gr-1<sup>+</sup> neutrophils in mouse abdominal cells by flow cytometry (G), and statistics of CD11b<sup>+</sup> Gr-1<sup>+</sup> neutrophils (H) (n = 3 per group and combined abdominal cells of 2 mice per sample). One-way ANOVA followed by Dunnett's multiple comparison test; Mean  $\pm$  s.e.m.; \*P < 0.05; \*\*P < 0.01, \*\*\*P < 0.001.

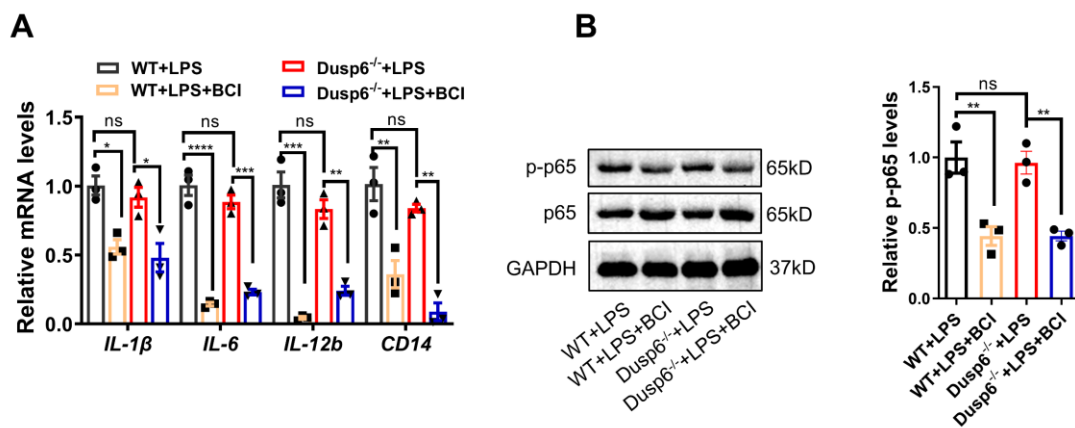

**Fig. S5. BCI inhibits macrophage inflammation independent of DUSP6.** (A) qRT-PCR showing expression levels of LPS-induced *IL-1 $\beta$* , *IL-6*, *IL-12b* and *CD14* mRNAs in WT or *Dusp6*<sup>-/-</sup> BMDMs with DMSO or BCI (n = 3 per group). (B) Western blots and quantification of LPS-induced p-p65 and p65 in WT or *Dusp6*<sup>-/-</sup> BMDMs with DMSO or BCI (n = 3 per group). Mean  $\pm$  s.e.m.; \*P < 0.05; \*\*P < 0.01, \*\*\*P < 0.001.

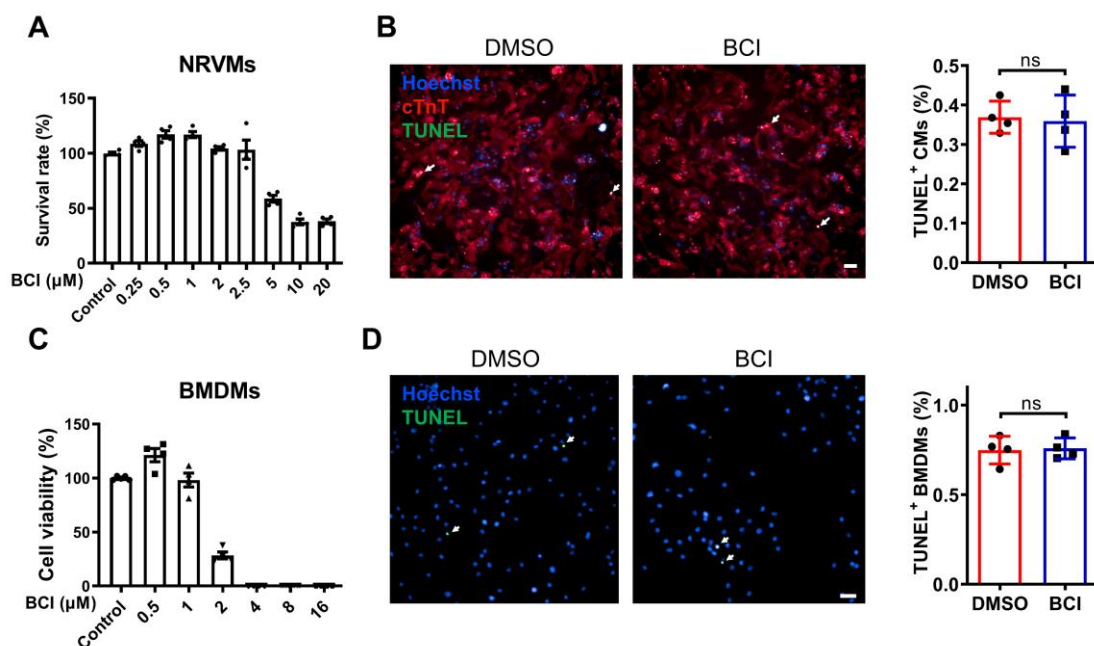

**Fig. S6. Dose-dependent toxicity of BCI to NRVMs and BMDMs.** (A) Cytotoxicity of different concentrations of BCI on NRVMs ( $n = 4$  per group). (B) Immunostaining and statistics showing TUNEL-positive NRVMs after DMSO or  $1 \mu\text{mol L}^{-1}$  BCI treatment. Scale bars,  $50 \mu\text{m}$ . ( $n = 4$  per group). (C) Cytotoxicity of different concentrations of BCI on BMDMs ( $n = 4$  per group). (D) Immunostaining and statistics showing TUNEL-positive BMDMs after DMSO or  $1 \mu\text{mol L}^{-1}$  BCI-treated. Scale bars,  $50 \mu\text{m}$ . ( $n = 4$  per group). ns, not significant.



**Table S1. Primers used in real-time PCR analysis**

| Gene                                | Primer  | Sequence (5'-3')        |
|-------------------------------------|---------|-------------------------|
| <i>Rat <math>\beta</math>-actin</i> | Forward | AACCTTCTTGCAGCTCCTCC    |
|                                     | Reverse | TACCCACCATCACACCCTGG    |
| <i>Rat Inos</i>                     | Forward | TGAAGCACTTTGGGTGACCA    |
|                                     | Reverse | TATACACGGAAGGGCCAAGC    |
| <i>Rat IL-1<math>\beta</math></i>   | Reverse | GACTTCACCATGGAACCCGT    |
|                                     | Forward | GGAGACTGCCCATTTCTCGAC   |
| <i>Rat IL-6</i>                     | Forward | ACAAGTCCGGAGAGGAGACT    |
|                                     | Reverse | TTGCCATTGCACAACCTCTTTTC |
| <i>Rat IL-12b</i>                   | Forward | ATCATCAAACCGGACCCACC    |
|                                     | Reverse | CAGGAGTCAGGGTACTCCCA    |
| <i>Rat Cd14</i>                     | Forward | TCAGAATCTACCGACCATGAAGC |
|                                     | Reverse | GCTCCAGCCCAGTGAAAGAT    |
| <i>Rat Mcp-1</i>                    | Forward | GATCCCAATGAGTCGGCTGG    |
|                                     | Reverse | ACAGAAGTGCTTGAGGTGGTT   |
| <i>Rat Ccr2</i>                     | Forward | CAACCTGGCCATCTCTGACC    |
|                                     | Reverse | AAGTGCATGTCAACCACACAG   |
| <i>Rat Ccl4</i>                     | Forward | GCTGTCAGCACCAATAGGCT    |
|                                     | Reverse | AGTTCCGATGAATCTTCCGGG   |
| <i>Rat Cxcl9</i>                    | Forward | GACTCCAGCACGGTACTTA     |
|                                     | Reverse | ATGCAGGAGCATCGCTGATT    |
| <i>Rat Mnda</i>                     | Forward | GGTGGGGAGTGGAAAATGGT    |
|                                     | Reverse | CGAGCTCTGGTGACCTTGAT    |
| <i>Rat Egr1</i>                     | Forward | AACAACCCTACGAGCACCTG    |
|                                     | Reverse | AAAGGGGTTTCAGGCCACAAA   |
| <i>Rat Grb2</i>                     | Forward | TTACGGAATCTCGCCGCTAC    |
|                                     | Reverse | AAAGGCTTCATGGGATGGGG    |
| <i>Rat Retnla</i>                   | Forward | CTGGCAAGGTCCTGGAACT     |
|                                     | Reverse | GCATAGGCCCCAGTCAACGAT   |
| <i>Rat Arg1</i>                     | Forward | GTGCCCTCTGTCTTTTAGGG    |
|                                     | Reverse | CAGACCGTGGGTTCTTCACA    |
| <i>Rat Yml</i>                      | Forward | ATGAGATCCCCCAGCTGTCT    |
|                                     | Reverse | GGTTACGGTCACATGGGTGT    |
